# Supplementary material
Source: publisher site journal article supplement (https://www.dovepress.com/article/279287)
Supplement: Supplementary file 1 [file get_supplementary_file.php]

**Supplementary material**

Table S1: RNA-seq dataset about the 7 PDAC patients. A total of 126 DEGs were identified incorporating 82 high-expressed genes and 44 low-expressed genes in PDAC tissues compared to adjacent normal samples.

| Gene ID | Gene Symbol | Type | log2 (tumor / normal) | Qvalue (tumor / normal) | Average tumor | Average normal | Pvalue (tumor / normal) | Change |
|---------|-------------|------|-----------------------|-------------------------|---------------|----------------|-------------------------|--------|
| 8972    | MGAM        | mRNA | -4.417738865          | 0.006503309             | 0.858571429   | 15.85571429    | 7.27E-05                | Down   |
| 4118    | MAL         | mRNA | -4.293881358          | 0.001297963             | 2.068571429   | 38.5           | 7.22E-06                | Down   |
| 4224    | MEP1A       | mRNA | -4.190668746          | 0.005167895             | 0.132857143   | 41.12857143    | 5.43E-05                | Down   |
| 163175  | LGI4        | mRNA | -3.689066838          | 0.001674943             | 4.164285714   | 52.56571429    | 1.11E-05                | Down   |
| 2890    | GRIA1       | mRNA | -3.066092453          | 0.008687364             | 0.07          | 0.404285714    | 1.05E-04                | Down   |
| 255426  | RASGEF1C    | mRNA | -2.880620904          | 0.011349888             | 0.065714286   | 1.73           | 1.60E-04                | Down   |
| 2555    | GABRA2      | mRNA | -2.749719596          | 0.089784505             | 1.614285714   | 0.601428571    | 0.005566249             | Down   |
| 5166    | PDK4        | mRNA | -2.547069181          | 0.015198665             | 173.1542857   | 423.1785714    | 2.57E-04                | Down   |
| 26084   | ARHGEF2     | mRNA | -2.429575542          | 0.004549718             | 4.79          | 25.56          | 4.54E-05                | Down   |
| 2520    | GAST        | mRNA | -2.389350156          | 0.764036863             | 0             | 32.02428571    | 0.435738822             | Down   |
| 9499    | MYOT        | mRNA | -2.333699548          | 0.017350321             | 0.721428571   | 3.215714286    | 3.20E-04                | Down   |
| 1580    | CYP4B1      | mRNA | -2.280177074          | 0.145630876             | 2.305714286   | 7.458571429    | 0.013717039             | Down   |
| 140628  | GATA5       | mRNA | -2.270176527          | 0.22740599              | 0.075714286   | 3.655714286    | 0.031859607             | Down   |
| 3040    | HBA2        | mRNA | -2.177562374          | 0.282540262             | 315.5085714   | 14433.28857    | 0.051271185             | Down   |
| 145270  | PRIMA1      | mRNA | -2.025823733          | 0.044251454             | 1.315714286   | 59.94428571    | 0.001608767             | Down   |
| 2676    | GFRA3       | mRNA | -1.898986259          | 3.14E-04                | 1.75          | 16.67          | 1.01E-06                | Down   |
| 3039    | HBA1        | mRNA | -1.816437326          | 0.401643188             | 275.2985714   | 11676.16286    | 0.104823712             | Down   |
| 3043    | HBB         | mRNA | -1.695566544          | 0.46666414              | 285.4228571   | 11973.77429    | 0.141298634             | Down   |
| 212     | ALAS2       | mRNA | -1.695376211          | 0.275493283             | 0.352857143   | 13.35714286    | 0.048567462             | Down   |
| 114815  | SORCS1      | mRNA | -1.566608671          | 0.00495257              | 0.434285714   | 11.01571429    | 5.11E-05                | Down   |
| 3977    | LIFR        | mRNA | -1.505189437          | 0.034763796             | 5.215714286   | 8.697142857    | 0.001064954             | Down   |
| 1E+08   | GIMD1       | mRNA | -1.315677654          | 0.891798329             | 0             | 1.188571429    | 0.669718421             | Down   |
| 5375    | PMP2        | mRNA | -1.299967738          | 0.185837125             | 0.291428571   | 13.85428571    | 0.021679548             | Down   |
| 5354    | PLP1        | mRNA | -1.285893721          | 0.278101495             | 2.05          | 64.45428571    | 0.049655299             | Down   |
| 2946    | GSTM2       | mRNA | -1.251085881          | 0.01630396              | 42.12714286   | 61.13          | 2.87E-04                | Down   |
| 253559  | CADM2       | mRNA | -1.205378672          | 0.268996731             | 0.128571429   | 2.445714286    | 0.046364756             | Down   |
| 5948    | RBP2        | mRNA | -1.157640119          | 0.537896256             | 0.442857143   | 599.5571429    | 0.191337968             | Down   |
| 4359    | MPZ         | mRNA | -1.080402151          | 0.228094484             | 3.881428571   | 220.39         | 0.032232419             | Down   |
| 2899    | GRIK3       | mRNA | -1.033939983          | 0.424052841             | 0.361428571   | 8.485714286    | 0.116878298             | Down   |
| 340895  | MALRD1      | mRNA | -0.912875299          | 0.597082017             | 0.128571429   | 6.637142857    | 0.242159596             | Down   |
| 4295    | MLN         | mRNA | -0.903482993          | 0.928383101             | 0.041428571   | 29.70142857    | 0.769595873             | Down   |
| 4547    | MTTP        | mRNA | -0.783458955          | 0.753236724             | 0.041428571   | 47.78142857    | 0.419996759             | Down   |
| 4311    | MME         | mRNA | -0.687489884          | 0.778865792             | 5.22          | 68.47          | 0.456399622             | Down   |
| 2824    | GPM6B       | mRNA | -0.530604032          | 0.526876906             | 2.437142857   | 40.45          | 0.183079243             | Down   |
| 407977  | TNFSF12-T   | mRNA | -0.526967535          | 0.954344183             | 1.845714286   | 0.815714286    | 0.829054308             | Down   |
| 728588  | MS4A18      | mRNA | -0.491288251          | 0.960758937             | 0.014285714   | 2.617142857    | 0.871620969             | Down   |
| 28513   | CDH19       | mRNA | -0.475444434          | 0.703061119             | 1.568571429   | 16.02285714    | 0.350817516             | Down   |
| 63928   | CHP2        | mRNA | -0.343158291          | 0.716476654             | 1.69          | 44.62571429    | 0.367854942             | Down   |
| 2168    | FABP1       | mRNA | -0.335522314          | 0.964748432             | 0.242857143   | 1147.687143    | 0.884998533             | Down   |
| 3674    | ITGA2B      | mRNA | -0.235041589          | 0.9166807               | 0.448571429   | 4.701428571    | 0.729856208             | Down   |
| 1373    | CPS1        | mRNA | -0.165909539          | 0.904887884             | 2.575714286   | 36.51          | 0.703384282             | Down   |
| 6476    | SI          | mRNA | -0.079095632          | 0.993703704             | 0.157142857   | 85.24428571    | 0.979542638             | Down   |
| 4225    | MEP1B       | mRNA | -0.076297295          | 0.959477531             | 1.027142857   | 46.87142857    | 0.842292181             | Down   |
| 338     | APOB        | mRNA | -0.074107488          | 0.977562649             | 0.398571429   | 57.10571429    | 0.924400219             | Down   |
| 1401    | CRP         | mRNA | 0.167587805           | 0.968510665             | 15.99857143   | 4.012857143    | 0.894513569             | UP     |
| 325     | APCS        | mRNA | 0.418193247           | 0.928383101             | 6.374285714   | 1.192857143    | 0.76986962              | UP     |
| 54209   | TREM2       | mRNA | 0.488923532           | 0.830867687             | 30.50285714   | 7.411428571    | 0.542227478             | UP     |
| 341     | APOC1       | mRNA | 0.626665467           | 0.761996982             | 126.92        | 28.97714286    | 0.432386611             | UP     |
| 2243    | FGA         | mRNA | 0.653151614           | 0.869855471             | 6.51          | 1.435714286    | 0.613925144             | UP     |
| 10537   | UBD         | mRNA | 0.667793088           | 0.780551958             | 116.67        | 21.69571429    | 0.460097422             | UP     |
| 56937   | PMEPA1      | mRNA | 0.842986422           | 0.464044389             | 161.9342857   | 28.75428571    | 0.139795764             | UP     |
| 3787    | KCNS1       | mRNA | 0.848172517           | 0.66197281              | 1.107142857   | 0.224285714    | 0.304699608             | UP     |
| 92312   | MEX3A       | mRNA | 1.137349083           | 0.142937072             | 2.512857143   | 0.604285714    | 0.013242228             | UP     |

|        |           |      |             |             |             |             |             |    |
|--------|-----------|------|-------------|-------------|-------------|-------------|-------------|----|
| 219699 | UNC5B     | mRNA | 1.143459816 | 0.073352619 | 17.39571429 | 2.587142857 | 0.003845605 | UP |
| 5754   | PTK7      | mRNA | 1.235501026 | 0.088813595 | 38.26714286 | 5.421428571 | 0.005441432 | UP |
| 57552  | NCEH1     | mRNA | 1.262463512 | 0.029046783 | 24.65       | 4.03        | 7.97E-04    | UP |
| 822    | CAPG      | mRNA | 1.290568208 | 0.13217919  | 188.3242857 | 27.13714286 | 0.011439443 | UP |
| 9965   | FGF19     | mRNA | 1.430523844 | 0.605777106 | 1.944285714 | 0.175714286 | 0.250822914 | UP |
| 5999   | RGS4      | mRNA | 1.63415229  | 0.050983053 | 8.48        | 0.971428571 | 0.002022879 | UP |
| 3855   | KRT7      | mRNA | 1.744739359 | 0.283821363 | 530.92      | 31.9        | 0.051827992 | UP |
| 10406  | WFDC2     | mRNA | 1.921623674 | 0.140901261 | 320.4985714 | 21.89       | 0.012815106 | UP |
| 6804   | STX1A     | mRNA | 1.940222691 | 0.002619689 | 40.50285714 | 3.864285714 | 1.96E-05    | UP |
| 27092  | CACNG4    | mRNA | 2.093358246 | 0.065525955 | 4.128571429 | 0.281428571 | 0.003218715 | UP |
| 2266   | FGG       | mRNA | 2.139975648 | 0.508147086 | 5.855714286 | 0.455714286 | 0.169091645 | UP |
| 128434 | VSTM2L    | mRNA | 2.19896118  | 0.010500568 | 33.82142857 | 2.548571429 | 1.41E-04    | UP |
| 4316   | MMP7      | mRNA | 2.237541168 | 0.198793407 | 1066.481429 | 48.65714286 | 0.02496937  | UP |
| 4973   | OLR1      | mRNA | 2.363308198 | 0.03724583  | 29.32285714 | 1.641428571 | 0.001214601 | UP |
| 9620   | CELSR1    | mRNA | 2.366466089 | 2.45E-05    | 15.35857143 | 1.232857143 | 4.84E-08    | UP |
| 84433  | CARD11    | mRNA | 2.462859314 | 8.27E-04    | 33.83285714 | 3.017142857 | 3.96E-06    | UP |
| 64220  | STRA6     | mRNA | 2.622716901 | 0.063993604 | 12.76142857 | 0.59        | 0.003060707 | UP |
| 1001   | CDH3      | mRNA | 2.703761778 | 0.021615054 | 29.87142857 | 1.045714286 | 4.65E-04    | UP |
| 24141  | LAMP5     | mRNA | 2.782721286 | 0.01192487  | 23.28285714 | 1.36        | 1.76E-04    | UP |
| 2646   | GCKR      | mRNA | 2.965651882 | 0.003195102 | 11.80142857 | 0.56        | 2.72E-05    | UP |
| 389376 | SFTA2     | mRNA | 2.979535191 | 0.016493953 | 47.17714286 | 1.247142857 | 2.92E-04    | UP |
| 1029   | CDKN2A    | mRNA | 2.996592996 | 0.005070759 | 36.50285714 | 1.837142857 | 5.30E-05    | UP |
| 169044 | COL22A1   | mRNA | 3.0219321   | 0.005799339 | 7.165714286 | 0.371428571 | 6.30E-05    | UP |
| 55083  | KIF26B    | mRNA | 3.215816074 | 1.59E-05    | 6.337142857 | 0.284285714 | 2.73E-08    | UP |
| 3854   | KRT6B     | mRNA | 3.267010592 | 0.078370952 | 12.5        | 0.311428571 | 0.004336958 | UP |
| 1087   | CEACAM7   | mRNA | 3.520726251 | 0.119148179 | 95.71285714 | 1.412857143 | 0.009605226 | UP |
| 405753 | DUOXA2    | mRNA | 3.669026071 | 0.11457371  | 63.80857143 | 0.954285714 | 0.008950419 | UP |
| 222    | ALDH3B2   | mRNA | 3.685880798 | 0.03880935  | 3.344285714 | 0.067142857 | 0.001294553 | UP |
| 1E+08  | TMED7-TIC | mRNA | 3.842307109 | 0.487130346 | 3.53        | 0.02        | 0.154767863 | UP |
| 3918   | LAMC2     | mRNA | 3.875564416 | 2.00E-05    | 140.4242857 | 3.165714286 | 3.65E-08    | UP |
| 1470   | CST2      | mRNA | 3.879589452 | 0.001180342 | 35.86428571 | 0.731428571 | 6.38E-06    | UP |
| 3934   | LCN2      | mRNA | 4.043874999 | 0.001436542 | 2761.927143 | 46.04       | 8.37E-06    | UP |
| 4148   | MATN3     | mRNA | 4.19501018  | 1.23E-06    | 38.71285714 | 1.19        | 1.02E-09    | UP |
| 221393 | ADGRF4    | mRNA | 4.300579672 | 0.001674943 | 2.71        | 0.038571429 | 1.10E-05    | UP |
| 5655   | KLK10     | mRNA | 4.372571968 | 3.26E-05    | 67.94285714 | 1.257142857 | 7.11E-08    | UP |
| 11082  | ESM1      | mRNA | 4.373764524 | 2.95E-06    | 6.021428571 | 0.162857143 | 3.68E-09    | UP |
| 6273   | S100A2    | mRNA | 4.402055095 | 0.007810162 | 26.25571429 | 0.381428571 | 9.07E-05    | UP |
| 94025  | MUC16     | mRNA | 4.405356951 | 0.003850315 | 4.717142857 | 0.062857143 | 3.54E-05    | UP |
| 653145 | ANXA8     | mRNA | 4.436920589 | 0.004549718 | 30.28       | 0.462857143 | 4.54E-05    | UP |
| 4884   | NPTX1     | mRNA | 4.460893312 | 1.42E-06    | 9.381428571 | 0.178571429 | 1.28E-09    | UP |
| 50506  | DUOX2     | mRNA | 4.488553707 | 0.002742538 | 172.2042857 | 1.682857143 | 2.11E-05    | UP |
| 57094  | CPA6      | mRNA | 4.551296901 | 0.001336449 | 3.561428571 | 0.087142857 | 7.58E-06    | UP |
| 728113 | ANXA8L1   | mRNA | 4.562621768 | 0.044432406 | 14.24714286 | 0.134285714 | 0.0016269   | UP |
| 266977 | ADGRF1    | mRNA | 4.66297612  | 2.69E-06    | 17.44       | 0.478571429 | 3.22E-09    | UP |
| 3868   | KRT16     | mRNA | 4.673638489 | 6.45E-06    | 14.23857143 | 0.228571429 | 9.06E-09    | UP |
| 84929  | FIBCD1    | mRNA | 4.771620096 | 3.89E-05    | 4.067142857 | 0.082857143 | 8.70E-08    | UP |
| 2707   | GJB3      | mRNA | 4.889217959 | 3.55E-07    | 27.18285714 | 0.384285714 | 2.03E-10    | UP |
| 3872   | KRT17     | mRNA | 4.899122058 | 0.002654547 | 408.44      | 3.468571429 | 2.02E-05    | UP |
| 6364   | CCL20     | mRNA | 4.901992186 | 6.21E-05    | 51.54       | 0.774285714 | 1.49E-07    | UP |
| 23650  | TRIM29    | mRNA | 4.917296757 | 1.00E-08    | 93.10714286 | 1.061428571 | 3.13E-12    | UP |
| 727897 | MUC5B     | mRNA | 5.078026244 | 0.001678063 | 131.6314286 | 0.477142857 | 1.13E-05    | UP |
| 84951  | TNS4      | mRNA | 5.13696992  | 1.78E-10    | 67.40857143 | 1.111428571 | 1.85E-14    | UP |
| 6291   | SAA4      | mRNA | 5.227151642 | 0.344744521 | 3.644285714 | 0           | 0.075621347 | UP |
| 6374   | CXCL5     | mRNA | 5.227228077 | 1.23E-06    | 89.83142857 | 1.17        | 1.02E-09    | UP |
| 3853   | KRT6A     | mRNA | 5.310354537 | 0.01479947  | 19.89857143 | 0.108571429 | 2.41E-04    | UP |
| 10232  | MSLN      | mRNA | 5.331819434 | 1.95E-06    | 158.93      | 1.347142857 | 2.23E-09    | UP |
| 1300   | COL10A1   | mRNA | 5.358879367 | 5.26E-09    | 159.7414286 | 0.862857143 | 1.37E-12    | UP |
| 1E+08  | TGIF2-RAE | mRNA | 5.360042169 | 0.082698795 | 1.838571429 | 0           | 0.00484743  | UP |

|        |         |      |             |          |             |             |          |    |
|--------|---------|------|-------------|----------|-------------|-------------|----------|----|
| 4680   | CEACAM6 | mRNA | 5.404768547 | 3.42E-07 | 1113.3      | 13.78571429 | 1.78E-10 | UP |
| 127534 | GJB4    | mRNA | 5.41635051  | 2.10E-05 | 6.048571429 | 0.084285714 | 4.03E-08 | UP |
| 11254  | SLC6A14 | mRNA | 5.436294993 | 1.01E-06 | 32.04571429 | 0.421428571 | 7.32E-10 | UP |
| 57214  | CEMIP   | mRNA | 5.441987644 | 3.97E-08 | 31.75428571 | 0.325714286 | 1.65E-11 | UP |
| 5650   | KLK7    | mRNA | 5.489144634 | 5.07E-07 | 71.25571429 | 0.827142857 | 3.43E-10 | UP |
| 6493   | SIM2    | mRNA | 5.501678454 | 2.10E-05 | 5.33        | 0.08        | 3.93E-08 | UP |
| 26154  | ABCA12  | mRNA | 5.520047979 | 1.41E-05 | 1.441428571 | 0.007142857 | 2.35E-08 | UP |
| 4585   | MUC4    | mRNA | 5.557531996 | 1.93E-06 | 39.38142857 | 0.67        | 2.01E-09 | UP |
| 4320   | MMP11   | mRNA | 5.660000347 | 1.38E-07 | 510.1971429 | 3.011428571 | 6.44E-11 | UP |
| 1301   | COL11A1 | mRNA | 5.744210744 | 1.19E-08 | 81.91285714 | 0.621428571 | 4.34E-12 | UP |
| 1472   | CST4    | mRNA | 6.003599046 | 3.26E-05 | 12.81       | 0.078571429 | 7.08E-08 | UP |
| 1048   | CEACAM5 | mRNA | 6.120786596 | 1.84E-09 | 523.4042857 | 4.131428571 | 3.83E-13 | UP |
| 5653   | KLK6    | mRNA | 6.736767868 | 4.61E-07 | 60.69       | 0.444285714 | 2.88E-10 | UP |
| 1469   | CST1    | mRNA | 7.157357274 | 9.28E-16 | 516.9028571 | 2.748571429 | 4.83E-20 | UP |
| 29943  | PADI1   | mRNA | 7.522617427 | 1.56E-06 | 33.91571429 | 0.034285714 | 1.54E-09 | UP |

**Supplementary Material**

Table S2: Sequences of primers for qRT-PCR

| Gene symbol | Primers    | Sequences of primers(5'to3')  |
|-------------|------------|-------------------------------|
| CEACAM5     | CEACAM5_1F | F: 5'- GCCACTCGGCCTCTAAC -3'  |
|             | CEACAM5_1R | F: 5'- TGTGTGTTGCTGCGGTAT -3' |
| KRT6A       | KRT6A_2F   | F: 5'-TGTGGCTCCTGATGGTG -3'   |
|             | KRT6A_2R   | F: 5'-TCCTGCTTCTCTTCCCTCT-3'  |
| KRT6B       | KRT6B_2F   | F: 5'-CCGGGTAGAGCTGGGAT -3'   |
|             | KRT6B_2R   | F: 5'-CGCATGTCTGAGTGCTGAT-3'  |
| KRT7        | KRT7_1F    | F: 5'-TGCCTCCTTCATCGACAA -3'  |
|             | KRT7_1R    | F: 5'-GCAATCTGGGCCTCAAAG -3'  |
| KRT17       | KRT17_2F   | F: 5'-GAGAGGATGCCCACCTGA -3'  |
|             | KRT17_2R   | F: 5'-CCGGGGTAGCTGAGTCC -3'   |
| GAPDH       | GAPDH_1F   | F: 5'-CCTTCCGTGTCCCCACT -3'   |
|             | GAPDH_1R   | F: 5'-GCCTGCTTCACCACCTTC -3'  |
